# Supplementary material for: Synthesis of Resins Using Epoxies and Humins as Building Blocks: A Mechanistic Study Based on in-situ FT-IR and NMR Spectroscopies
Source: Preprints.org preprint supplement (doi:10.20944/preprints201910.0140.v1), 2019-10-12
Supplement: Supplementary file 1 [file supplementary]

# Synthesis of Resins Using Epoxies and Humins as Building Blocks: A Mechanistic Study Based on in-situ FT-IR and NMR Spectroscopies

Xavier Montané <sup>1</sup>, Roxana Dinu <sup>1</sup> and Alice Mija <sup>1,\*</sup>

## CONTENTS OF THE SUPPORTING INFORMATION

### 1. Complementary figures for FT-IR spectroscopy investigations

**Figure S1.** FT-IR spectra of the used catalyst (BDMA) and raw materials: GDE, PEGDE and humins.

**Table S1.** Assignments of major bands on FT-IR spectra of humins.

**Table S2.** Assignments of major bands on FT-IR spectra of GDE, PEGDE and BDMA.

**Figure S2.** FT-IR spectra evolution during the copolymerization of HG40B5.

**Figure S3.** FT-IR spectra evolution during the copolymerization of HP40B5.

**Figure S4.** FT-IR spectra evolution during the copolymerization of HP20G20B5.

### 2. Complementary figures for NMR investigations

**Figure S5.** <sup>1</sup>H NMR spectra of PEGDE, BDMA, humins and HP40B5 at t = 0.

**Figure S6.** <sup>13</sup>C NMR spectra of PEGDE, BDMA, humins and HP40B5 at t = 0.

**Figure S7.** HSQC NMR spectra of HG40B5 at t = 0. In the spectra, the blue signals correspond to -CH- and -CH<sub>3</sub> signals, while the red ones correspond to -CH<sub>2</sub>- signals.

**Figure S8.** HMBC NMR spectra of HG40B5 at t = 0 h.

**Figure S9.** <sup>13</sup>C NMR spectra of HP40B5 at t = 0 h and t = 6 h.

**Figure S10.** <sup>1</sup>H NMR spectra of GDE monomer and GDE homopolymer at t = 6 h.

**Figure S11.** HSQC NMR spectra of GDE homopolymer at t = 0 h. In the spectra, the blue signals correspond to -CH- and -CH<sub>3</sub> signals, while the red ones correspond to -CH<sub>2</sub>- signals.

**Figure S12.** HSQC NMR spectra of GDE homopolymer at t = 6 h. In the spectra, the blue signals correspond to -CH- and -CH<sub>3</sub> signals, while the red ones correspond to -CH<sub>2</sub>- signals.

**Figure S13.** <sup>1</sup>H NMR spectra of humins with BDMA at t = 0 h and the same mixture at t = 6 h.

**Figure S14.** COSY NMR spectra of HG40B5 at t = 0 h.

**Figure S15.** <sup>1</sup>H NMR spectra of HP40B5 at t = 0 and at t = 6 h.

**Figure S16.** <sup>1</sup>H NMR spectra of HP20G20B5 at t = 0 and at t = 6 h.

**Figure S17.** <sup>13</sup>C NMR spectra of HP20G20B5 at t = 0 h and t = 6 h.

## 1. Complementary figures for FT-IR spectroscopy investigations

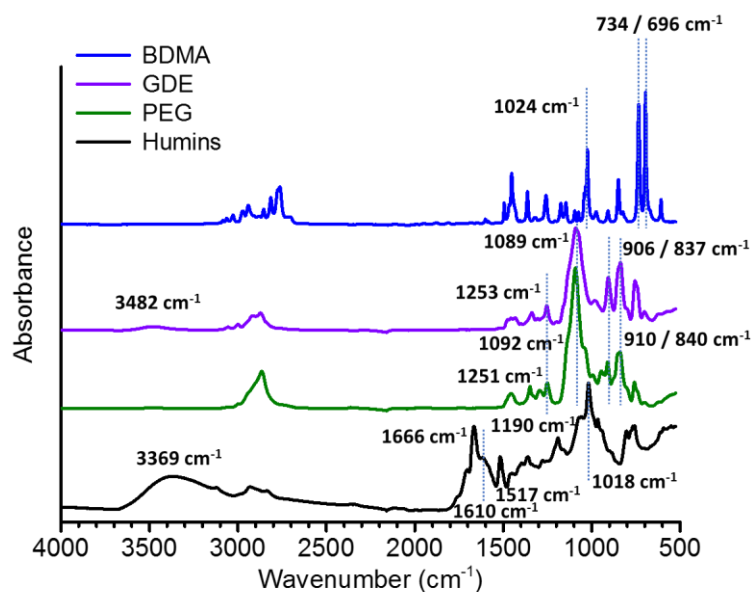

**Figure S1.** FT-IR spectra of the used catalyst (BDMA) and raw materials: GDE, PEGDE and humins.

**Table S1.** Assignment of major bands on FT-IR spectra of humins.

| Wavenumber (cm <sup>-1</sup> ) | Assignment                                                                                                                      |
|--------------------------------|---------------------------------------------------------------------------------------------------------------------------------|
| 3369                           | O-H stretching vibration of associated -OH by hydrogen bonding                                                                  |
| 3120                           | -(C=C)-H asymmetric/symmetric stretching vibration                                                                              |
| 2930                           | C-H (-CH <sub>2</sub> -) asymmetric stretching vibration in aliphatic methylene units                                           |
| 2837                           | C-H (-CH <sub>2</sub> -) symmetric stretching vibration in aliphatic methylene units                                            |
| 1702                           | -C=O stretching vibration of acids, esters and conjugated carbonyl groups                                                       |
| 1666                           | -C=O stretching vibration of aldehyde groups                                                                                    |
| 1617                           | -C=C- stretching vibration conjugated to -C=O                                                                                   |
| 1580-1500                      | -C=C- stretching vibration in furan rings                                                                                       |
| 1517                           | -C=C- stretching vibration in furan rings linked to aldehyde groups                                                             |
| 1490-1410                      | C-H asymmetric bending deformation in -CH <sub>3</sub> ; C-H asymmetric and symmetric bending deformation in -CH <sub>2</sub> - |
| 1360                           | C-H symmetric bending deformation in -O-CH <sub>3</sub>                                                                         |
| 1190                           | -C-C- asymmetric stretching vibration in furan rings                                                                            |
| 1018                           | -C-O- stretching vibration in furan rings                                                                                       |
| 804                            | -(C=C)-H wagging out-of-plane in furan rings (bending)                                                                          |
| 768                            | -(C=C)-H wagging out-of-plane in furan rings (bending)                                                                          |

**Table S2.** Assignments of major bands on FT-IR spectra of GDE, PEGDE and BDMA.

| Wavenumber<br>(cm <sup>-1</sup> ) | Assignment                                                                | Compound            |
|-----------------------------------|---------------------------------------------------------------------------|---------------------|
| 3482                              | O-H stretching vibration                                                  | GDE                 |
| 3100-3000                         | C-H stretching vibration (aromatic)                                       | BDMA                |
| 3056                              | C-H stretching vibration (-CH-); epoxy group                              | PEGDE, GDE          |
| 3000                              | C-H stretching vibration (-CH-); epoxy group                              | GDE                 |
| 3000-2700                         | C-H stretching vibration (aliphatic)                                      | PEGDE, GDE,<br>BDMA |
| 2993                              | C-H stretching vibration (-CH-); epoxy group                              | PEGDE               |
| 1490-1410                         | C-H asymmetric and symmetric bending<br>deformation in -CH <sub>2</sub> - | PEGDE, GDE          |
| 1253                              | C-O-C symmetric stretching vibration of oxirane<br>group; epoxy group     | GDE                 |
| 1251                              | C-O-C symmetric stretching vibration of oxirane<br>group; epoxy group     | PEGDE               |
| 1092                              | C-O-C asymmetric stretching vibration; ether linkage                      | PEGDE               |
| 1089                              | C-O-C asymmetric stretching vibration; ether linkage                      | GDE                 |
| 1024                              | C-N stretching vibration; aliphatic tertiary amine                        | BDMA                |
| 910                               | C-O-C asymmetric stretching vibration of oxirane<br>group; epoxy group    | PEGDE               |
| 906                               | C-O-C asymmetric stretching vibration of oxirane<br>group; epoxy group    | GDE                 |
| 840                               | C-O-C bending deformation of oxirane group; epoxy<br>group                | PEGDE               |
| 837                               | C-O-C bending deformation of oxirane group; epoxy<br>group                | GDE                 |
| 758                               | C-H wagging out-of-plane in epoxy ring (bending)                          | PEGDE               |
| 755                               | C-H wagging out-of-plane in epoxy ring (bending)                          | GDE                 |
| 734                               | C-H out-of-plane bending deformation in the<br>aromatic ring              | BDMA                |
| 696                               | C-H out-of-plane bending deformation in the<br>aromatic ring              | BDMA                |

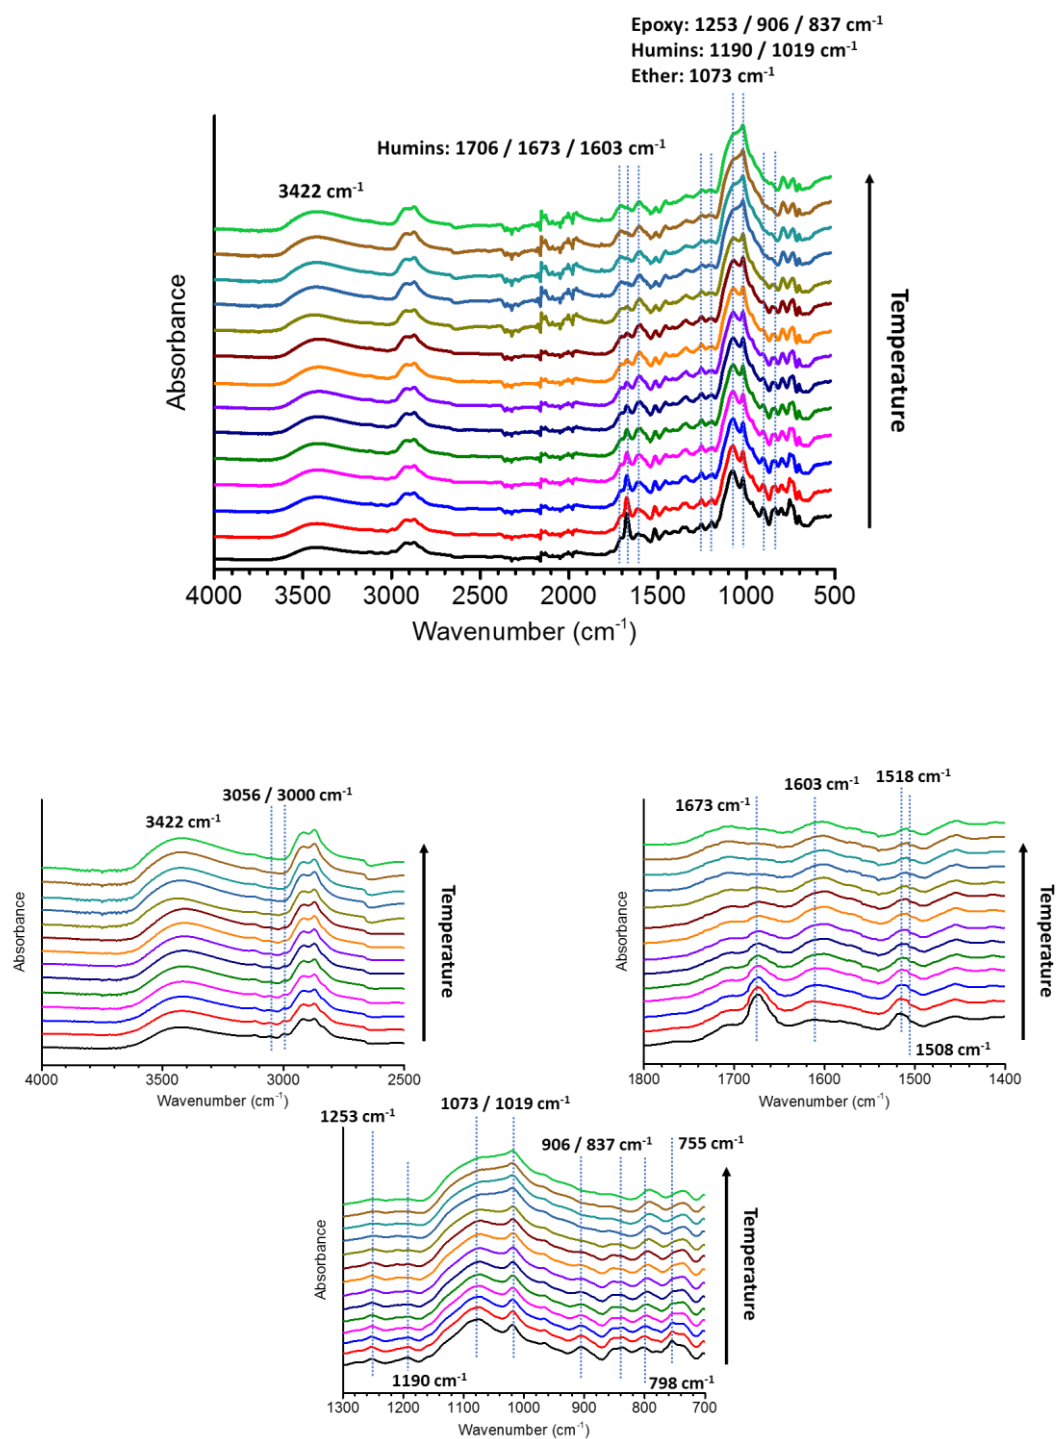

**Figure S2.** FT-IR spectra evolution during the polymerization of HG40B5.

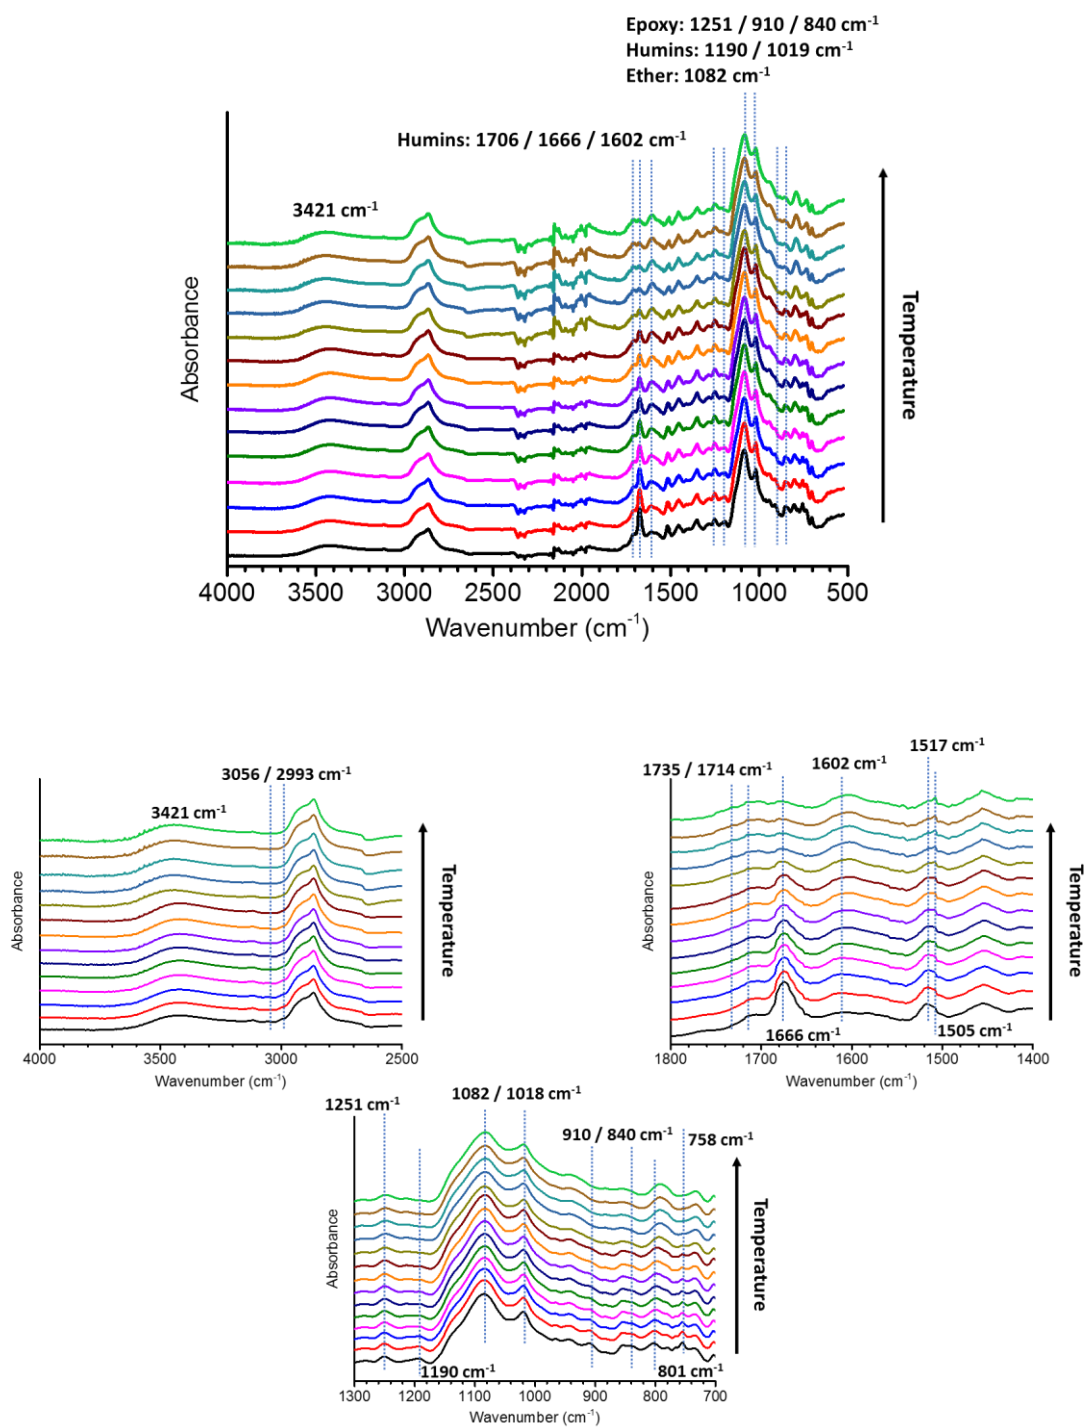

**Figure S3.** FT-IR spectra evolution during the polymerization of HP40B5.

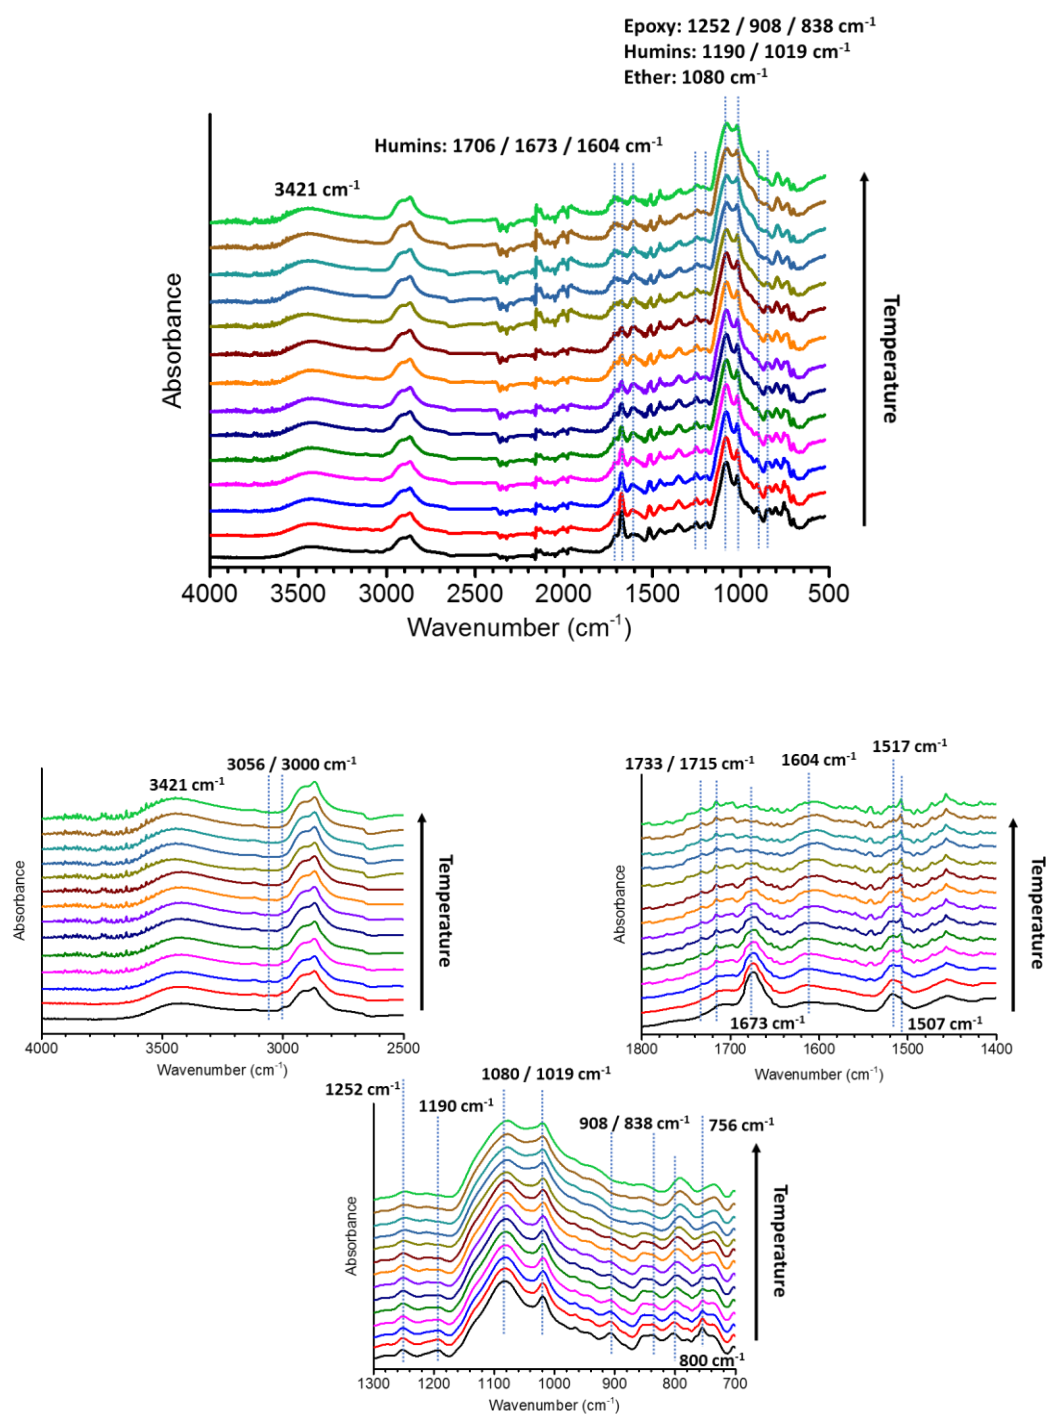

**Figure S4.** FT-IR spectra evolution during the polymerization of HP20G20B5.

## 2. Complementary figures for NMR investigations

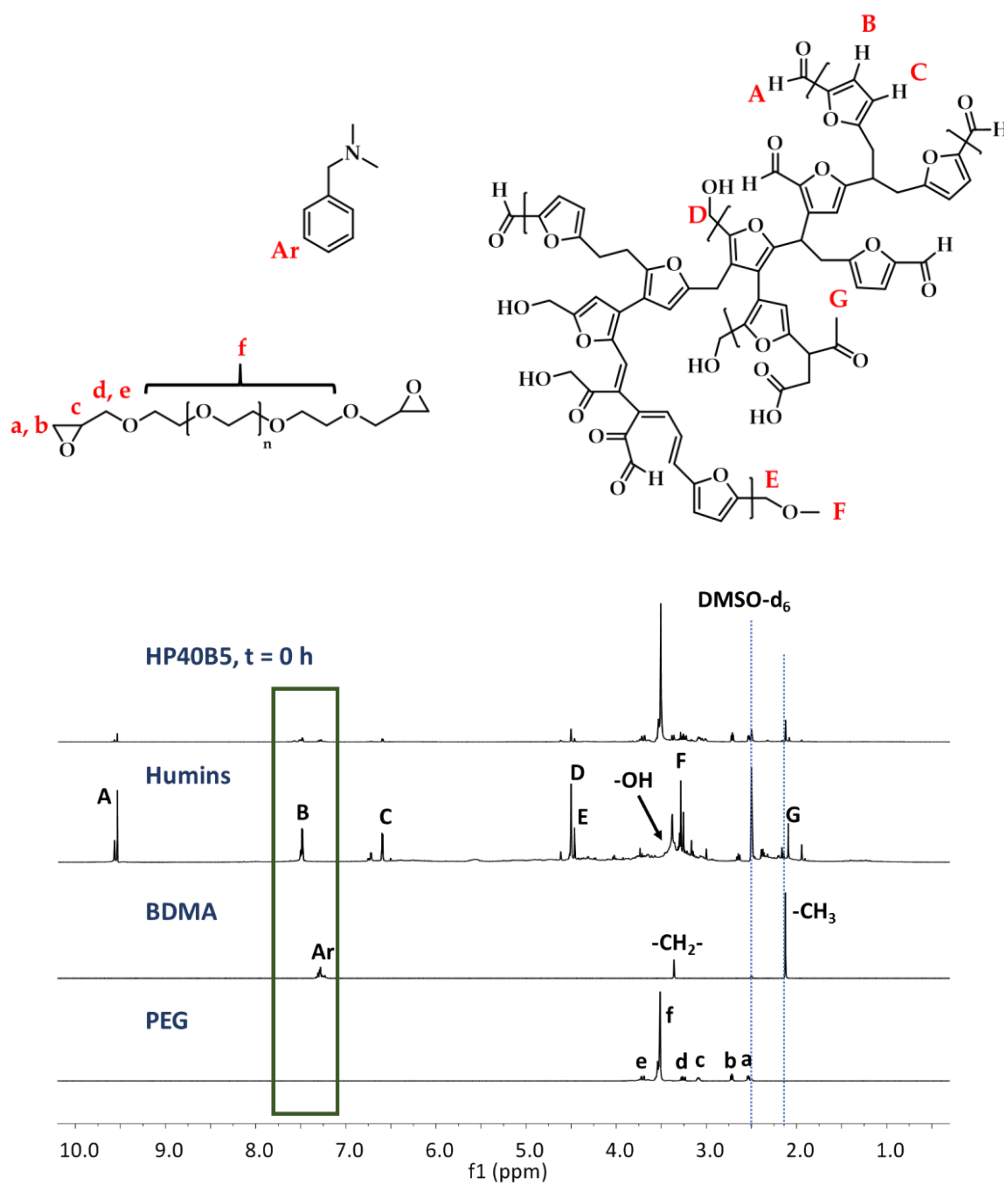

**Figure S5.**  $^1\text{H}$  NMR spectra of PEGDE, BDMA, humins and HP40B5 at  $t = 0$ .

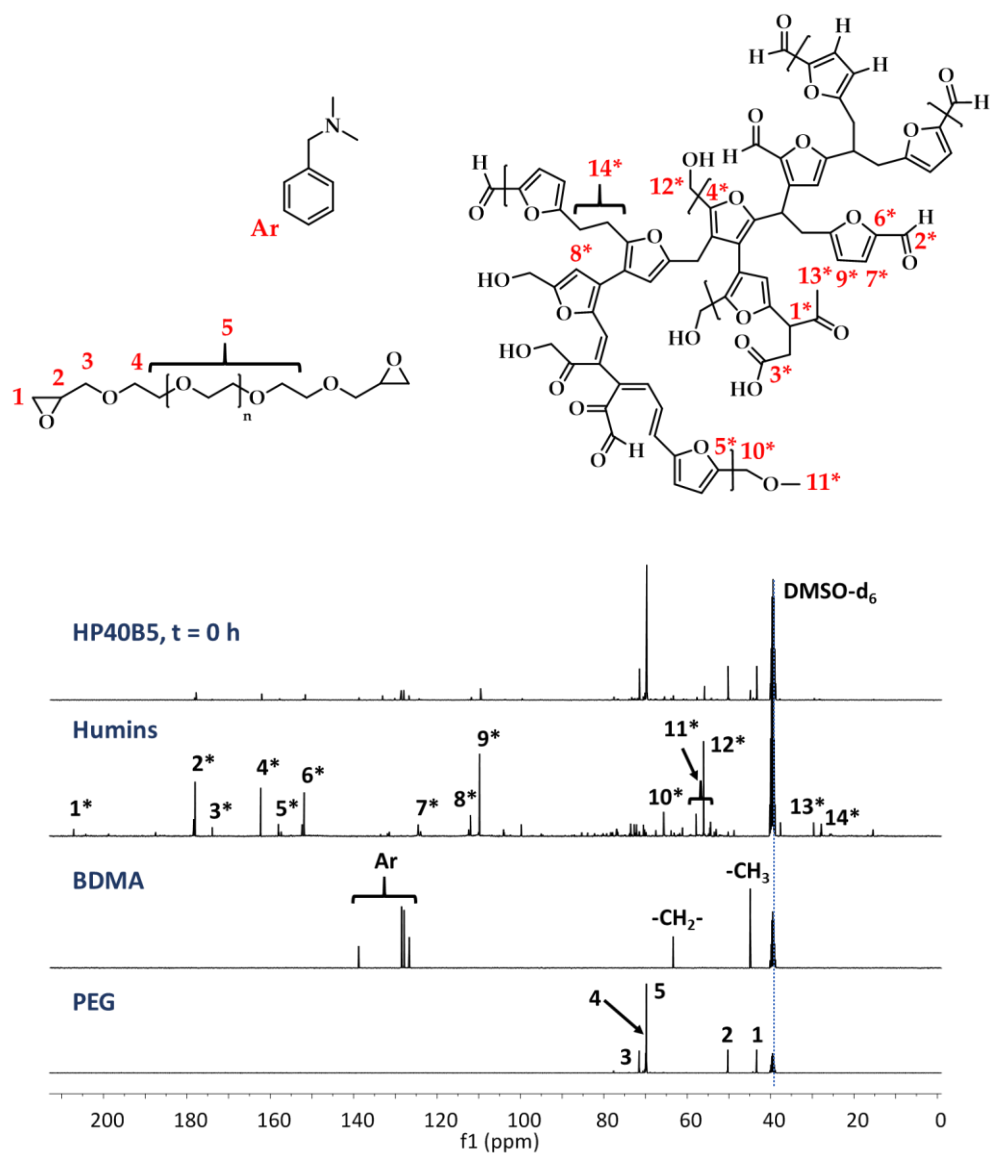

**Figure S6.**  $^{13}\text{C}$  NMR spectra of PEGDE, BDMA, humins and HP40B5 at  $t = 0$ .



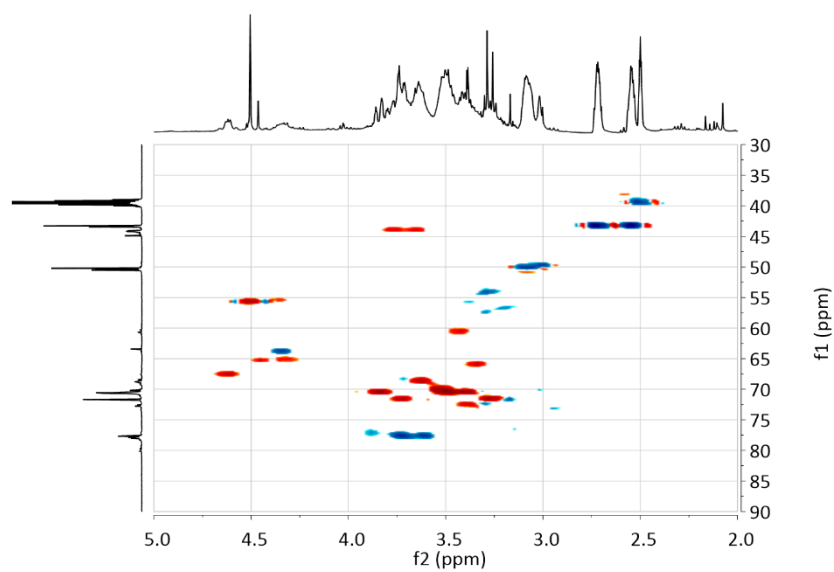

**Figure S7.** HSQC NMR spectra of HG40B5 at  $t = 0$ . In the spectra, the blue signals correspond to  $-CH-$  and  $-CH_3$  signals, while the red ones correspond to  $-CH_2-$  signals.

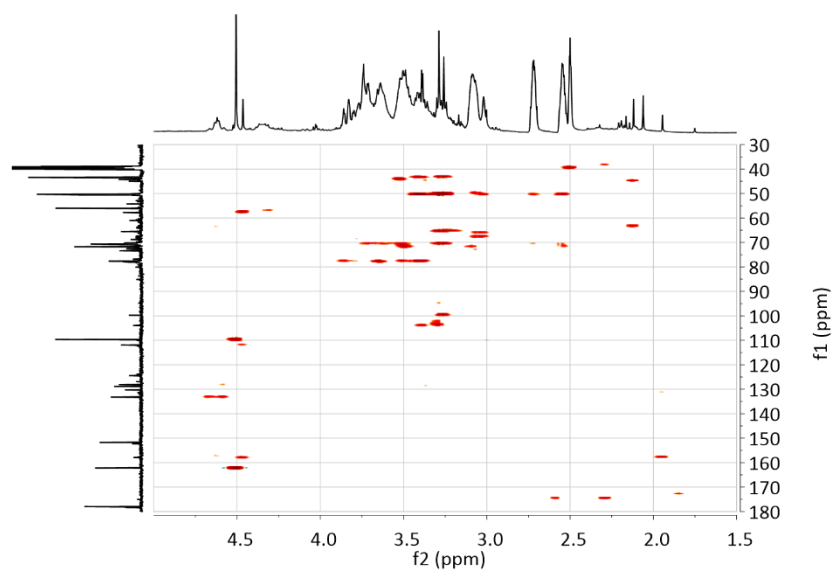

**Figure S8.** HMBC NMR spectra of HG40B5 at  $t = 0$  h.

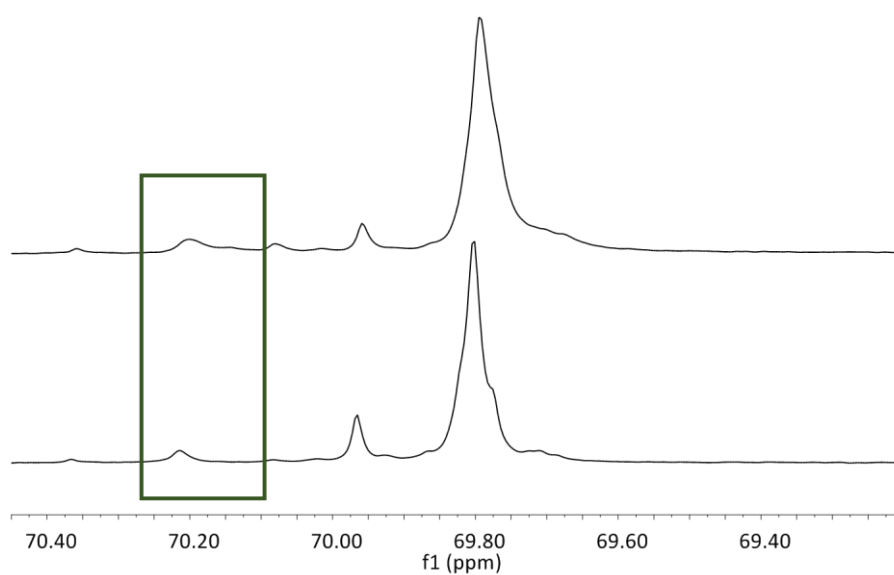

**Figure S9.**  $^{13}\text{C}$  NMR spectra of HP40B5 at  $t = 0$  h and  $t = 6$  h.

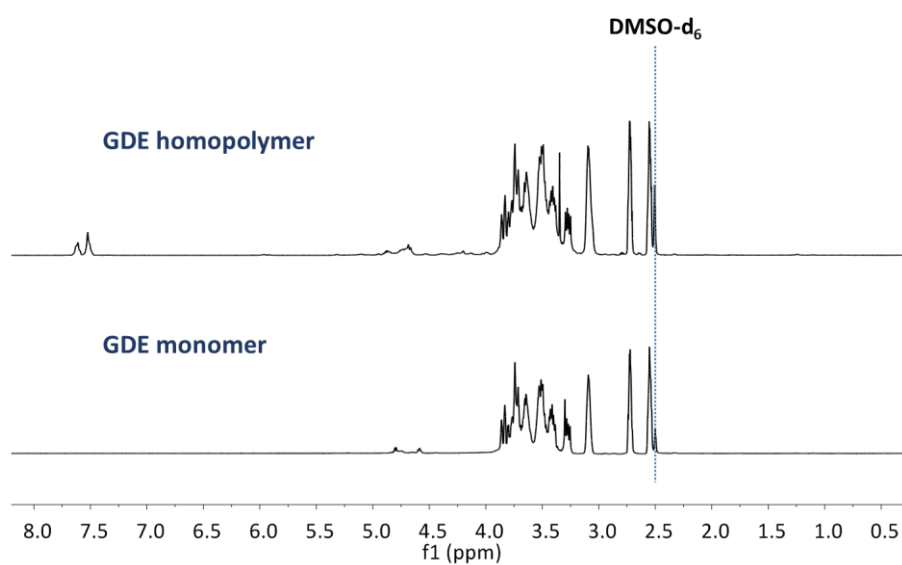

**Figure S10.**  $^1\text{H}$  NMR spectra of GDE monomer and GDE homopolymer at  $t = 6$  h.

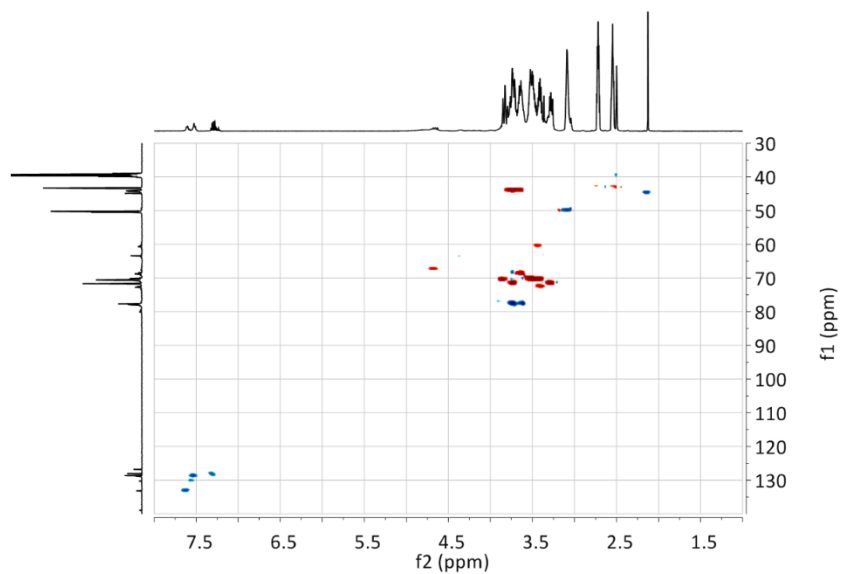

**Figure S11.** HSQC NMR spectra of GDE homopolymer at  $t = 0$  h. In the spectra, the blue signals correspond to  $-CH-$  and  $-CH_3$  signals, while the red ones correspond to  $-CH_2-$  signals.

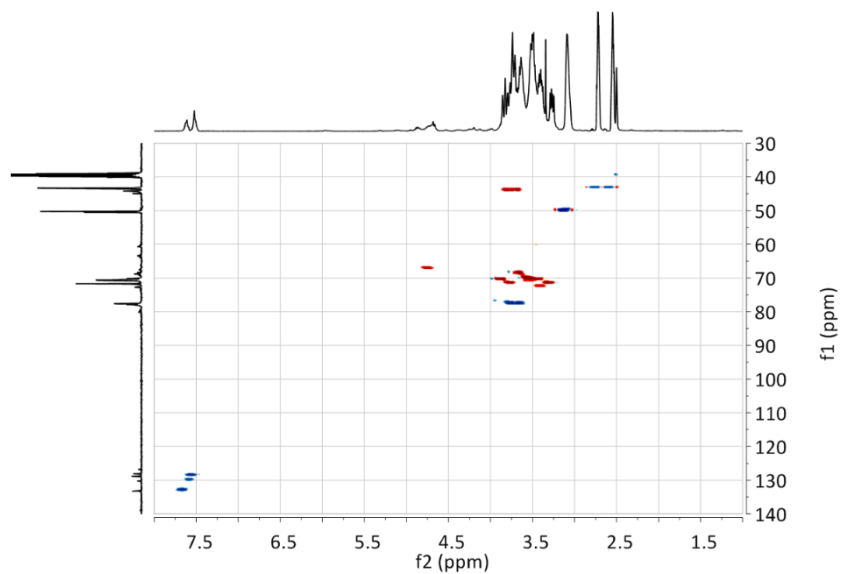

**Figure S12.** HSQC NMR spectra of GDE homopolymer at  $t = 6$  h. In the spectra, the blue signals correspond to  $-CH-$  and  $-CH_3$  signals, while the red ones correspond to  $-CH_2-$  signals.

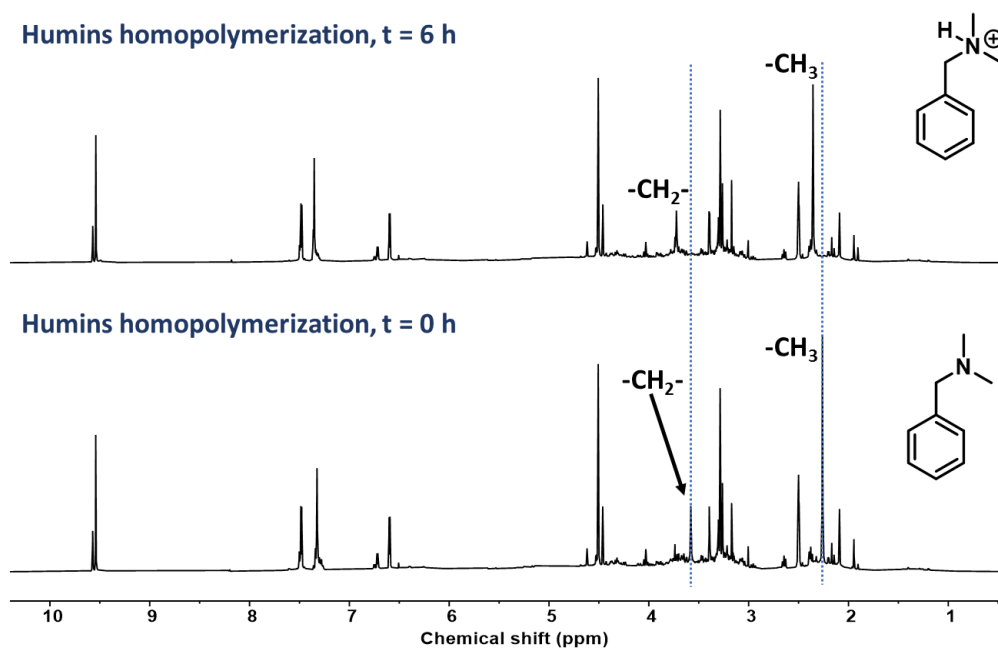

**Figure S13.**  $^1\text{H}$  NMR spectra of humins with BDMA at t = 0 h and the same mixture at t = 6 h.

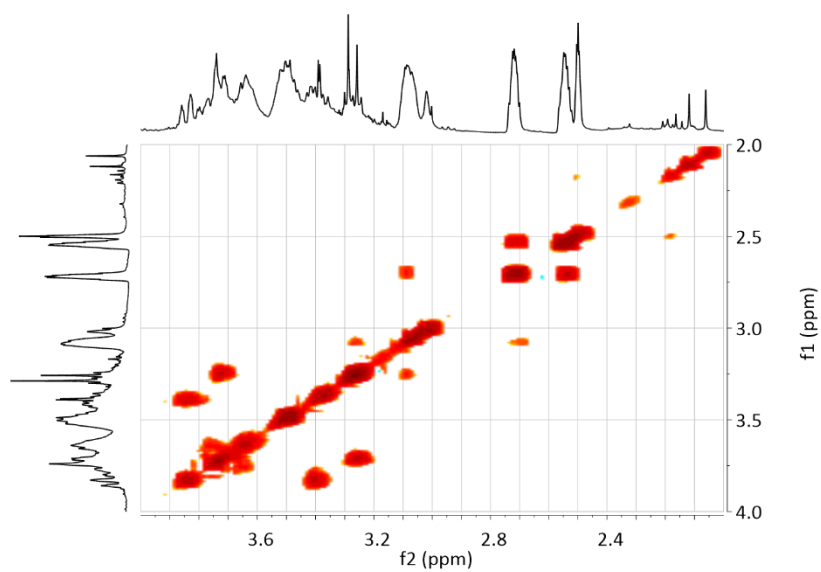

**Figure S14.** COSY NMR spectra of HG40B5 at t = 0 h.

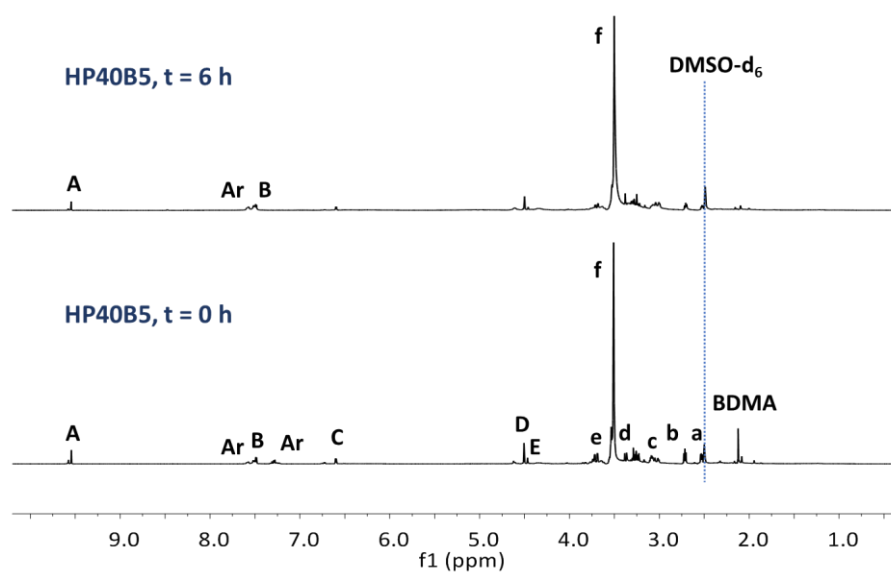

**Figure S15.** <sup>1</sup>H NMR spectra of HP40B5 at t = 0 and at t = 6 h.

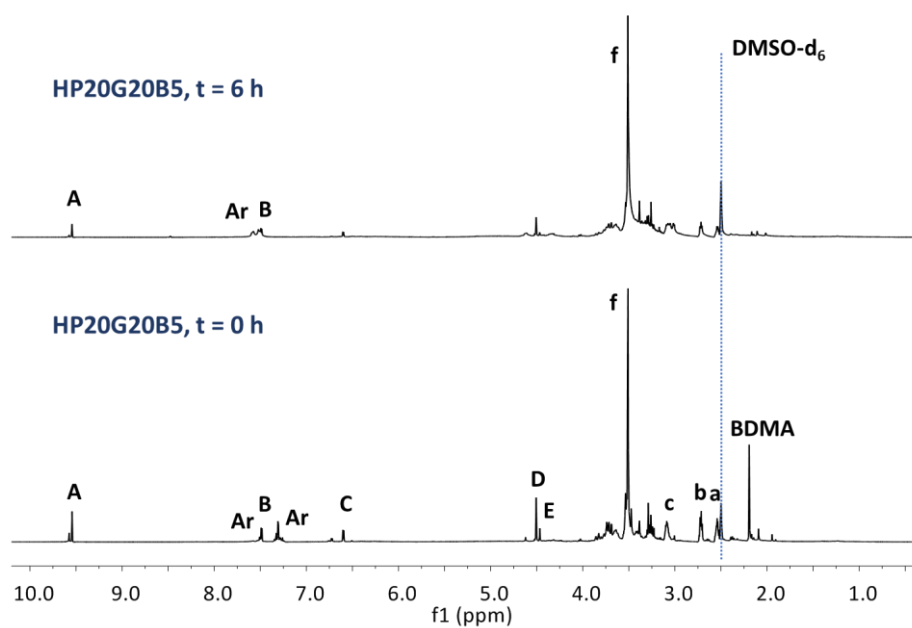

**Figure S16.** <sup>1</sup>H NMR spectra of HP20G20B5 at t = 0 and at t = 6 h.

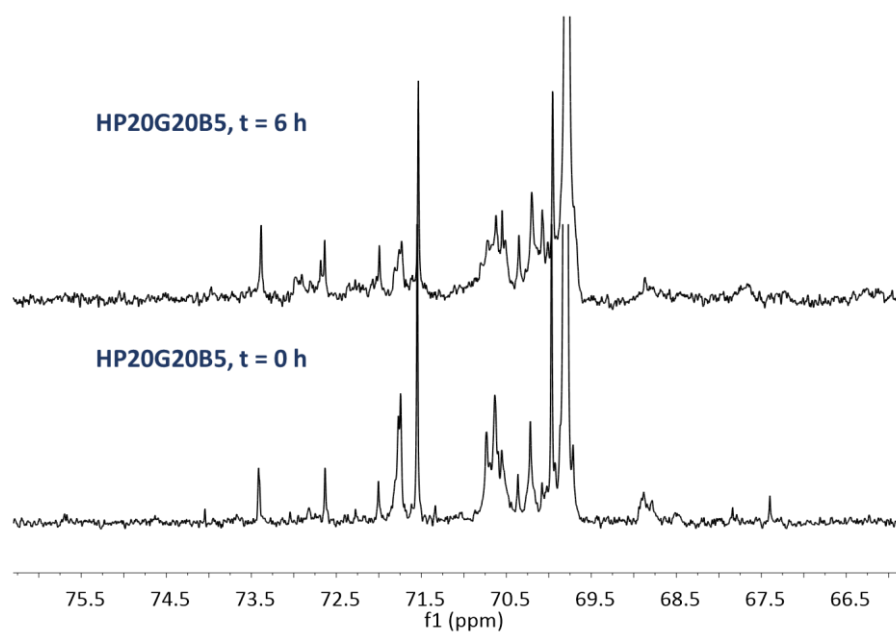

**Figure S17.**  $^{13}\text{C}$  NMR spectra of HP20G20B5 at t = 0 h and t = 6 h.
